# Supplementary material for: The OH-initiated chemical transformation of 1,2,4,6,8,10,11-heptachloroundecane in the atmosphere
Source: Royal Society of Chemistry journal article supplement (doi:10.1039/c5ra00612k), 2015-01-01
Supplement: c5ra00612k1.pdf [file c5ra00612k1.pdf]

## Supplementary Information for

### The OH-initiated Chemical Transformation of 1,2,4,6,8,10,11-heptachloroundecane in the Atmosphere

Ruirui Liu,<sup>a</sup> Chenxi Zhang,<sup>b</sup> Lingyan Kang,<sup>a</sup> Xiaomin Sun,<sup>\*a</sup> Yan Zhao<sup>c</sup>

**S1 The structures and energies of all the 170 mono-substituted C<sub>11</sub>H<sub>17</sub>Cl<sub>7</sub> isomers** (for mono-substituted C<sub>11</sub>H<sub>17</sub>Cl<sub>7</sub>, there are only 4 C atoms which have no Cl atom attached. All the C atoms are numbered from 1 to 11, and the numbers listed in the table indicate the non-attached C atoms. For example, atom numbers 3,5,7,9 means the structure 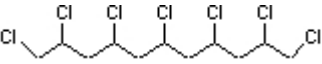. All the energies were calculated at b3lyp/6-31+g(d) level.)

| molecule numbers | Energy (- Hartree) | atom numbers | molecule numbers | Energy (- Hartree) | atom numbers | molecule numbers | Energy (- Hartree) | atom numbers |
|------------------|--------------------|--------------|------------------|--------------------|--------------|------------------|--------------------|--------------|
| 1                | 3650.8070          | 1,2,3,4      | 58               | 3650.8178          | 1,3,7,11     | 115              | 3650.8230          | 2,3,5,10     |
| 2                | 3650.8013          | 1,2,3,5      | 59               | 3650.8278          | 1,3,8,9      | 116              | 3650.8140          | 2,3,6,7      |
| 3                | 3650.7968          | 1,2,3,6      | 60               | 3650.8244          | 1,3,8,10     | 117              | 3650.8238          | 2,3,6,8      |
| 4                | 3650.8057          | 1,2,3,7      | 61               | 3650.8245          | 1,3,8,11     | 118              | 3650.8309          | 2,3,6,9      |
| 5                | 3650.8148          | 1,2,3,8      | 62               | 3650.8184          | 1,3,9,10     | 119              | 3650.8337          | 2,3,6,10     |
| 6                | 3650.8038          | 1,2,3,9      | 63               | 3650.8135          | 1,3,9,11     | 120              | 3650.8104          | 2,3,7,8      |
| 7                | 3650.8049          | 1,2,3,10     | 64               | 3650.8056          | 1,4,5,6      | 121              | 3650.8233          | 2,3,7,9      |
| 8                | 3650.8012          | 1,2,3,11     | 65               | 3650.8198          | 1,4,5,7      | 122              | 3650.8222          | 2,3,7,10     |
| 9                | 3650.7997          | 1,2,4,5      | 66               | 3650.8234          | 1,4,5,8      | 123              | 3650.8139          | 2,3,8,9      |

|    |           |          |    |           |          |     |           |          |
|----|-----------|----------|----|-----------|----------|-----|-----------|----------|
| 10 | 3650.8041 | 1,2,4,6  | 67 | 3650.8226 | 1,4,5,9  | 124 | 3650.8222 | 2,3,8,10 |
| 11 | 3650.8171 | 1,2,4,7  | 68 | 3650.8107 | 1,4,5,10 | 125 | 3650.8034 | 2,3,9,10 |
| 12 | 3650.8149 | 1,2,4,8  | 69 | 3650.8074 | 1,4,5,11 | 126 | 3650.8005 | 2,4,5,6  |
| 13 | 3650.8257 | 1,2,4,9  | 70 | 3650.8189 | 1,4,6,7  | 127 | 3650.8150 | 2,4,5,7  |
| 14 | 3650.8091 | 1,2,4,10 | 71 | 3650.8224 | 1,4,6,8  | 128 | 3650.8188 | 2,4,5,8  |
| 15 | 3650.8042 | 1,2,4,11 | 72 | 3650.8324 | 1,4,6,9  | 129 | 3650.8178 | 2,4,5,9  |
| 16 | 3650.8038 | 1,2,5,6  | 73 | 3650.8254 | 1,4,6,10 | 130 | 3650.8177 | 2,4,5,10 |
| 17 | 3650.8178 | 1,2,5,7  | 74 | 3650.8301 | 1,4,6,11 | 131 | 3650.8125 | 2,4,6,7  |
| 18 | 3650.8217 | 1,2,5,8  | 75 | 3650.8178 | 1,4,7,8  | 132 | 3650.8201 | 2,4,6,8  |
| 19 | 3650.8223 | 1,2,5,9  | 76 | 3650.8285 | 1,4,7,9  | 133 | 3650.8272 | 2,4,6,9  |
| 20 | 3650.8246 | 1,2,5,10 | 77 | 3650.8277 | 1,4,7,10 | 134 | 3650.8130 | 2,4,6,10 |
| 21 | 3650.8069 | 1,2,5,11 | 78 | 3650.8248 | 1,4,7,11 | 135 | 3650.8186 | 2,4,7,8  |
| 22 | 3650.8039 | 1,2,6,7  | 79 | 3650.8226 | 1,4,8,9  | 136 | 3560.8135 | 2,4,7,9  |
| 23 | 3650.8135 | 1,2,6,8  | 80 | 3650.8208 | 1,4,8,10 | 137 | 3650.8175 | 2,4,7,10 |
| 24 | 3650.8211 | 1,2,6,9  | 81 | 3650.8256 | 1,4,8,11 | 138 | 3650.8180 | 2,4,8,9  |
| 25 | 3650.8224 | 1,2,6,10 | 82 | 3650.8173 | 1,4,9,10 | 139 | 3650.8146 | 2,4,8,10 |
| 26 | 3650.8087 | 1,2,6,11 | 83 | 3650.8060 | 1,5,6,7  | 140 | 3650.8091 | 2,5,6,7  |
| 27 | 3650.8047 | 1,2,7,8  | 84 | 3650.8158 | 1,5,6,8  | 141 | 3650.8188 | 2,5,6,8  |
| 28 | 3650.8126 | 1,2,7,9  | 85 | 3650.8224 | 1,5,6,9  | 142 | 3650.8181 | 2,5,6,9  |
| 29 | 3650.8113 | 1,2,7,10 | 86 | 3650.8057 | 1,5,6,10 | 143 | 3650.8088 | 2,5,6,10 |
| 30 | 3650.8089 | 1,2,7,11 | 87 | 3650.8075 | 1,5,6,11 | 144 | 3650.8226 | 2,5,7,8  |
| 31 | 3650.8147 | 1,2,8,9  | 88 | 3650.8158 | 1,5,7,8  | 145 | 3650.8255 | 2,5,7,9  |
| 32 | 3650.8114 | 1,2,8,10 | 89 | 3650.8260 | 1,5,7,9  | 146 | 3650.8235 | 2,5,7,10 |
| 33 | 3650.8067 | 1,2,8,11 | 90 | 3650.8204 | 1,5,7,10 | 147 | 3650.8260 | 2,5,8,9  |

|    |           |           |     |           |          |            |                  |                |
|----|-----------|-----------|-----|-----------|----------|------------|------------------|----------------|
| 34 | 3650.7992 | 1,2,9,10  | 91  | 3650.8168 | 1,5,7,11 | 148        | 3650.8045        | 2,6,7,8        |
| 35 | 3650.8132 | 1,2,9,11  | 92  | 3650.8232 | 1,5,8,9  | 149        | 3650.8248        | 2,6,7,9        |
| 36 | 3650.7873 | 1,2,10,11 | 93  | 3650.8200 | 1,5,8,10 | 150        | 3650.8175        | 2,6,8,9        |
| 37 | 3650.8027 | 1,3,4,5   | 94  | 3650.8142 | 1,5,9,10 | 151        | 3650.8209        | 2,7,8,9        |
| 38 | 3650.8204 | 1,3,4,6   | 95  | 3650.8065 | 1,6,7,8  | 152        | 3650.8036        | 3,4,5,6        |
| 39 | 3650.8181 | 1,3,4,7   | 96  | 3650.8191 | 1,6,7,9  | 153        | 3650.8178        | 3,4,5,7        |
| 40 | 3650.8153 | 1,3,4,8   | 97  | 3650.8108 | 1,6,7,10 | 154        | 3650.8218        | 3,4,5,8        |
| 41 | 3650.8277 | 1,3,4,9   | 98  | 3650.8198 | 1,6,8,9  | 155        | 3650.8209        | 3,4,5,9        |
| 42 | 3650.8138 | 1,3,4,10  | 99  | 3650.8147 | 1,6,8,10 | 156        | 3650.8153        | 2,4,6,7        |
| 43 | 3650.8032 | 1,3,4,11  | 100 | 3650.8268 | 1,6,9,10 | 157        | 3650.8241        | 3,4,6,8        |
| 44 | 3650.8092 | 1,3,5,6   | 101 | 3650.8053 | 1,7,8,9  | 158        | 3650.8323        | 3,4,6,9        |
| 45 | 3650.8149 | 1,3,5,7   | 102 | 3650.8019 | 1,7,8,10 | 159        | 3650.8192        | 3,4,7,8        |
| 46 | 3650.8206 | 1,3,5,8   | 103 | 3650.8192 | 1,7,9,10 | 160        | 3650.8322        | 3,4,7,9        |
| 47 | 3650.8211 | 1,3,5,9   | 104 | 3650.8007 | 1,8,9,10 | 161        | 3650.8185        | 3,4,8,9        |
| 48 | 3650.8236 | 1,3,5,10  | 105 | 3650.7982 | 2,3,4,5  | 162        | 3650.8171        | 3,5,6,7        |
| 49 | 3650.8153 | 1,3,5,11  | 106 | 3650.8170 | 2,3,4,6  | 163        | 3650.8268        | 3,5,6,8        |
| 50 | 3650.8187 | 1,3,6,7   | 107 | 3650.8154 | 2,3,4,7  | 164        | 3650.8335        | 3,5,6,9        |
| 51 | 3650.8270 | 1,3,6,8   | 108 | 3650.8123 | 2,3,4,8  | 165        | 3650.8244        | 3,5,7,8        |
| 52 | 3650.8338 | 1,3,6,9   | 109 | 3650.8073 | 2,3,4,9  | <b>166</b> | <b>3650.8339</b> | <b>3,5,7,9</b> |
| 53 | 3650.8192 | 1,3,6,10  | 110 | 3650.8107 | 2,3,4,10 | 167        | 3650.8065        | 3,6,7,8        |
| 54 | 3650.8204 | 1,3,6,11  | 111 | 3650.8064 | 2,3,5,6  | 168        | 3650.8044        | 4,5,6,7        |
| 55 | 3650.8152 | 1,3,7,8   | 112 | 3650.8194 | 2,3,5,7  | 169        | 3650.8143        | 4,5,6,8        |
| 56 | 3650.8269 | 1,3,7,9   | 113 | 3650.8245 | 2,3,5,8  | 170        | 3650.8126        | 4,5,7,8        |
| 57 | 3650.8259 | 1,3,7,10  | 114 | 3650.8248 | 2,3,5,9  |            |                  |                |

---

## S2 Structures of intermediates, transition states and products

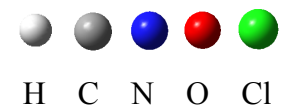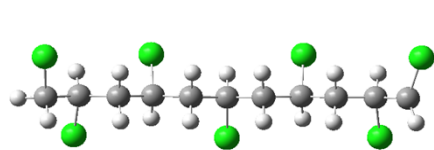

IMa1

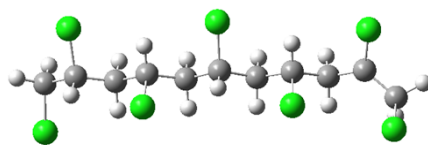

IMa3

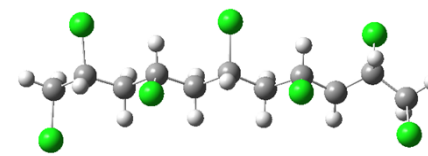

IMa5

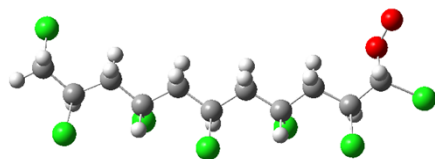

IMb1

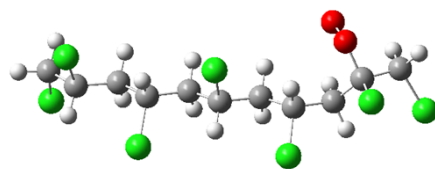

IMb3

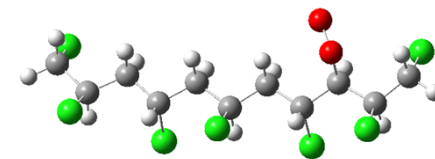

IMb5

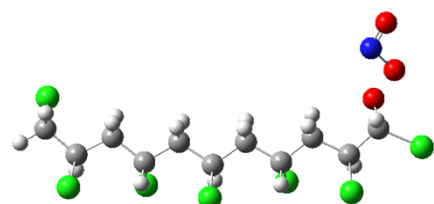

IMc1

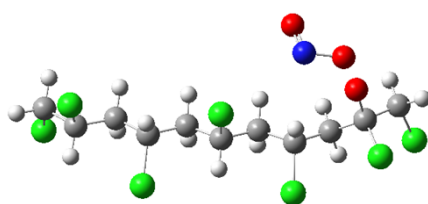

IMc3

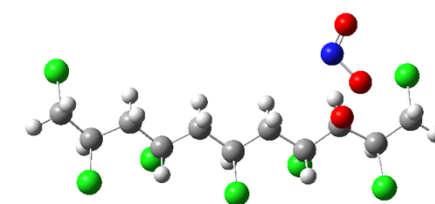

IMc5

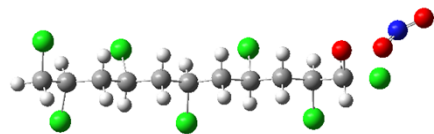

TSb1

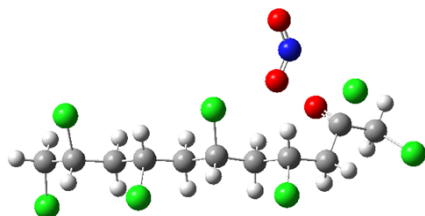

TSb3

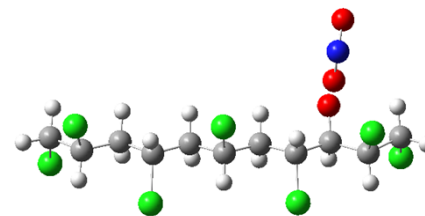

TSb5

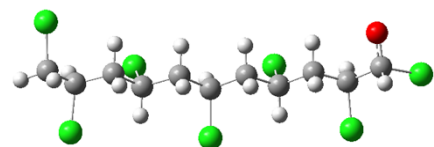

IMd1

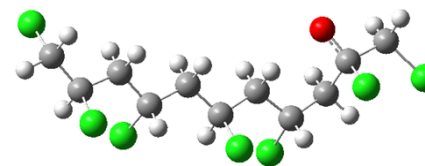

IMd3

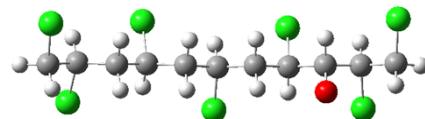

IMd5

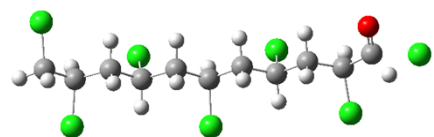

TScl

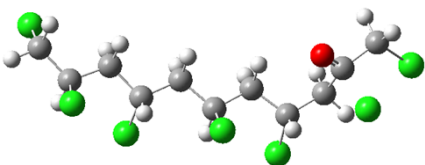

TScl3

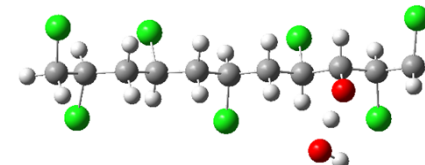

TScl5

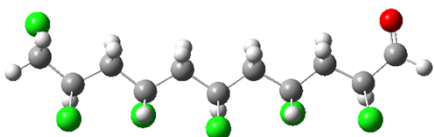

Pb1

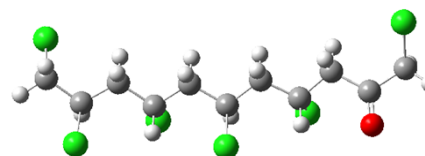

Pb3

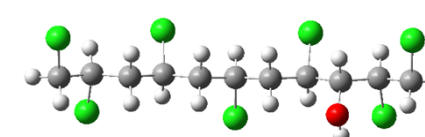

Pb5
